# Supplementary material
Source: MDPI journal article supplement (https://www.mdpi.com/2226-471X/7/4/267)
Supplement: s1 [file s1]

**Table S1.** Experimental Stimuli

| <b>Condition</b> | <b>Item</b>                                            |
|------------------|--------------------------------------------------------|
| Unilingual       | El novio le regaló unas pantallas plateadas.           |
| LOLI             | El novio le regaló unas earrings plateadas.            |
| MWCS             | El novio le regaló unas silver earrings.               |
| Unilingual       | Los prisioneros querían escaparse de la cárcel segura. |
| LOLI             | Los prisioneros querían escaparse de la prison segura. |
| MWCS             | Los prisioneros querían escaparse de la safe prison.   |
| Unilingual       | El huésped no pudo dormir en la cama incómoda.         |
| LOLI             | El huésped no pudo dormir en la bed incomoda.          |
| MWCS             | El huésped no pudo dormir en la uncomfortable bed.     |
| Unilingual       | El restaurante no va a usar las tazas plásticas.       |
| LOLI             | El restaurante no va a usar las cups plásticas.        |
| MWCS             | El restaurante no va a usar las plastic cups.          |
| Unilingual       | La mujer endulzó el té con miel orgánica.              |
| LOLI             | La mujer endulzó el té con honey orgánica.             |
| MWCS             | La mujer endulzó el té con organic honey.              |
| Unilingual       | El hombre amaneció con la nariz hinchada.              |
| LOLI             | El hombre amaneció con la nose hinchada.               |
| MWCS             | El hombre amaneció con la swollen nose.                |
| Unilingual       | El conserje no pudo usar la llave doblada.             |
| LOLI             | El conserje no pudo usar la key doblada.               |
| MWCS             | El conserje no pudo usar la bent key.                  |
| Unilingual       | El hombre tenía que cambiar la goma desinflada.        |
| LOLI             | El hombre tenía que cambiar la wheel desinflada.       |
| MWCS             | El hombre tenía que cambiar la deflated wheel.         |
| Unilingual       | El armario de la niña está lleno de faldas coloridas.  |
| LOLI             | El armario de la niña está lleno de skirts coloridas.  |
| MWCS             | El armario de la niña está lleno de colorful skirts.   |
| Unilingual       | La criada limpió la alfombra sucia.                    |
| LOLI             | La criada limpió la carpet sucia.                      |
| MWCS             | La criada limpió la dirty carpet.                      |
| Unilingual       | El biólogo tomó una foto de las mariposas hermosas.    |
| LOLI             | El biólogo tomó una foto de las butterflies hermosas.  |
| MWCS             | El biólogo tomó una foto de las beautiful butterflies. |
| Unilingual       | El chico no podía encontrar una sudadera liviana.      |
| LOLI             | El chico no podía encontrar una sweatshirt liviana.    |
| MWCS             | El chico no podía encontrar una light sweatshirt.      |
| Unilingual       | La pastelería tuvo que botar las galletas empalagosas. |
| LOLI             | La pastelería tuvo que botar las cookies empalagosas.  |
| MWCS             | La pastelería tuvo que botar las oversweet cookies.    |
| Unilingual       | La abuela decoró el bizcocho con unas fresas dulces.   |

|            |                                                            |
|------------|------------------------------------------------------------|
| LOLI       | La abuela decoró el bizcocho con unas strawberries dulces. |
| MWCS       | La abuela decoró el bizcocho con unas sweet strawberries.  |
| Unilingual | La mujer se vistió con una blusa linda.                    |
| LOLI       | La mujer se vistió con una blouse linda.                   |
| MWCS       | La mujer se vistió con una pretty blouse.                  |
| Unilingual | El jardinero sembró flores en el jardín bonito.            |
| LOLI       | El jardinero sembró flores en el garden bonito.            |
| MWCS       | El jardinero sembró flores en el lovely garden.            |
| Unilingual | Al niño le pusieron un yeso en el hueso fracturado.        |
| LOLI       | Al niño le pusieron un yeso en el bone fracturado.         |
| MWCS       | Al niño le pusieron un yeso en el fractured bone.          |
| Unilingual | La actriz no quiso comprar el collar barato.               |
| LOLI       | La actriz no quiso comprar el necklace barato.             |
| MWCS       | La actriz no quiso comprar el cheap necklace.              |
| Unilingual | La mujer adornó el regalo con un lazo violeta.             |
| LOLI       | La mujer adornó el regalo con un bow violeta.              |
| MWCS       | La mujer adornó el regalo con un purple bow.               |
| Unilingual | El perro se asustó con el pájaro ruidoso.                  |
| LOLI       | El perro se asustó con el bird ruidoso.                    |
| MWCS       | El perro se asustó con el noisy bird.                      |
| Unilingual | A la bióloga la atacó un mono travieso.                    |
| LOLI       | A la bióloga la atacó un monkey travieso.                  |
| MWCS       | A la bióloga la atacó un mischievous monkey.               |
| Unilingual | El hombre maneja un camión lento.                          |
| LOLI       | El hombre maneja un truck lento.                           |
| MWCS       | El hombre maneja un slow truck.                            |
| Unilingual | Los pajaritos duermen en el nido pequeño.                  |
| LOLI       | Los pajaritos duermen en el nest pequeño.                  |
| MWCS       | Los pajaritos duermen en el small nest.                    |
| Unilingual | La mamá sacó de la nevera el pavo congelado.               |
| LOLI       | La mamá sacó de la nevera el turkey congelado.             |
| MWCS       | La mamá sacó de la nevera el frozen turkey.                |
| Unilingual | Al gato lo perseguía el gallo loco.                        |
| LOLI       | Al gato lo perseguía el rooster loco.                      |
| MWCS       | Al gato lo perseguía el crazy rooster.                     |
| Unilingual | El ladrón robó el anillo brillante.                        |
| LOLI       | El ladrón robó el ring brillante.                          |
| MWCS       | El ladrón robó el shiny ring.                              |
| Unilingual | La señora triste buscaba un pañuelo limpio.                |
| LOLI       | La señora triste buscaba un handkerchief limpio.           |
| MWCS       | La señora triste buscaba un clean handkerchief.            |
| Unilingual | La enfermera se puso unos guantes estériles.               |
| LOLI       | La enfermera se puso unos gloves estériles.                |

|            |                                                     |
|------------|-----------------------------------------------------|
| MWCS       | La enfermera se puso unos steril gloves.            |
| Unilingual | El desayuno está hecho con huevos frescos.          |
| LOLI       | El desayuno está hecho con eggs frescos.            |
| MWCS       | El desayuno está hecho con fresh eggs.              |
| Unilingual | El viejo quería vender el reloj antiguo.            |
| LOLI       | El viejo quería vender el clock antiguo.            |
| MWCS       | El viejo quería vender el antique clock.            |
| Unilingual | Compraron una casa con una cocina espaciosa.        |
| LOLI       | Compraron una casa con una kitchen espaciosa.       |
| MWCS       | Compraron una casa con una spacious kitchen.        |
| Unilingual | El evento se canceló por la lluvia fuerte.          |
| LOLI       | El evento se canceló por la rain fuerte.            |
| MWCS       | El evento se canceló por la strong rain.            |
| Unilingual | La abuelita cocinó una cena deliciosa.              |
| LOLI       | La abuelita cocinó una dinner deliciosa.            |
| MWCS       | La abuelita cocinó una delicious dinner.            |
| Unilingual | El trabajador no podía abrir la caja cerrada.       |
| LOLI       | El trabajador no podía abrir la box cerrada.        |
| MWCS       | El trabajador no podía abrir la closed box.         |
| Unilingual | El hijo tuvo que recoger las hojas caídas.          |
| LOLI       | El hijo tuvo que recoger las leaves caídas.         |
| MWCS       | El hijo tuvo que recoger las fallen leaves.         |
| Unilingual | El hombre pidió una cerveza fría.                   |
| LOLI       | El hombre pidió una beer fría.                      |
| MWCS       | El hombre pidió una cold beer.                      |
| Unilingual | El nadador se afeitó las piernas peludas.           |
| LOLI       | El nadador se afeitó las legs peludas.              |
| MWCS       | El nadador se afeitó las hairy legs.                |
| Unilingual | El perrito jugaba en la nieve blanca.               |
| LOLI       | El perrito jugaba en la snow blanca.                |
| MWCS       | El perrito jugaba en la white snow.                 |
| Unilingual | Todo el mundo puede ver la bandera grande.          |
| LOLI       | Todo el mundo puede ver la flag grande.             |
| MWCS       | Todo el mundo puede ver la large flag.              |
| Unilingual | Es imposible dormir con una almohada dura.          |
| LOLI       | Es imposible dormir con una pillow dura.            |
| MWCS       | Es imposible dormir con una hard pillow.            |
| Unilingual | Al explorador lo mordió una araña venenosa.         |
| LOLI       | Al explorador lo mordió una spider venenosa.        |
| MWCS       | Al explorador lo mordió una venomous spider.        |
| Unilingual | El sospechoso fue identificado por la corbata azul. |
| LOLI       | El sospechoso fue identificado por la tie azul.     |
| MWCS       | El sospechoso fue identificado por la blue tie.     |

|            |                                                      |
|------------|------------------------------------------------------|
| Unilingual | A la chica la picó una abeja enojada.                |
| LOLI       | A la chica la picó una bee enojada.                  |
| MWCS       | A la chica la picó una angry bee.                    |
| Unilingual | El granjero puso las manzanas en una canasta roja.   |
| LOLI       | El granjero puso las manzanas en una basket roja.    |
| MWCS       | El granjero puso las manzanas en una red basket.     |
| Unilingual | Es imposible hacer copias con la impresora dañada.   |
| LOLI       | Es imposible hacer copias con la printer dañada.     |
| MWCS       | Es imposible hacer copias con la damaged printer.    |
| Unilingual | La vieja colgó el espejo adornado.                   |
| LOLI       | La vieja colgó el mirror adornado.                   |
| MWCS       | La vieja colgó el decorative mirror.                 |
| Unilingual | La novia se vistió con un vestido bello.             |
| LOLI       | La novia se vistió con un dress bello.               |
| MWCS       | La novia se vistió con un beautiful dress.           |
| Unilingual | La veterinaria cuidó al oso enfermo.                 |
| LOLI       | La veterinaria cuidó al bear enfermo.                |
| MWCS       | La veterinaria cuidó al sick bear.                   |
| Unilingual | El cocinero buscaba un cuchillo afilado.             |
| LOLI       | El cocinero buscaba un knife afilado.                |
| MWCS       | El cocinero buscaba un sharp knife.                  |
| Unilingual | La sopa está hecha con un caldo salado.              |
| LOLI       | La sopa está hecha con un broth salado.              |
| MWCS       | La sopa está hecha con un savory broth.              |
| Unilingual | El restaurante es conocido por sus plátanos fritos.  |
| LOLI       | El restaurante es conocido por sus plantains fritos. |
| MWCS       | El restaurante es conocido por sus fried plantains.  |
| Unilingual | El hombre de negocios llevó un traje marrón.         |
| LOLI       | El hombre de negocios llevó un suit marrón.          |
| MWCS       | El hombre de negocios llevó un brown suit.           |
| Unilingual | El conductor no vio el semáforo escondido.           |
| LOLI       | El conductor no vio el stop sign escondido.          |
| MWCS       | El conductor no vio el hidden stop sign.             |
| Unilingual | La manta nueva está hecha de algodón suave.          |
| LOLI       | La manta nueva está hecha de cotton suave.           |
| MWCS       | La manta nueva está hecha de soft cotton.            |
| Unilingual | Los buzos encontraron un barco hundido.              |
| LOLI       | Los buzos encontraron un boat hundido.               |
| MWCS       | Los buzos encontraron un sunken boat.                |
| Unilingual | El abuelo siempre va a pescar en el lago profundo.   |
| LOLI       | El abuelo siempre va a pescar en el lake profundo.   |
| MWCS       | El abuelo siempre va a pescar en el deep lake.       |
| Unilingual | La artista necesita un pincel grueso.                |

|            |                                                         |
|------------|---------------------------------------------------------|
| LOLI       | La artista necesita un paintbrush grueso.               |
| MWCS       | La artista necesita un thick paintbrush.                |
| Unilingual | El astronauta navega el cohete poderoso.                |
| LOLI       | El astronauta navega el rocket poderoso.                |
| MWCS       | El astronauta navega el powerful rocket.                |
| Unilingual | A la reina le regalaron un peine dorado.                |
| LOLI       | A la reina le regalaron un brush dorado.                |
| MWCS       | A la reina le regalaron un golden brush.                |
| Unilingual | Los niños comieron el helado sabroso.                   |
| LOLI       | Los niños comieron el ice cream sabroso.                |
| MWCS       | Los niños comieron el tasty ice cream.                  |
| Unilingual | La secretaria escribió una nota en la tarjeta cuadrada. |
| LOLI       | La secretaria escribió una nota en la card cuadrada.    |
| MWCS       | La secretaria escribió una nota en la square card.      |
| Unilingual | Rompieron la ventana con una piedra pesada.             |
| LOLI       | Rompieron la ventana con una rock pesada.               |
| MWCS       | Rompieron la ventana con una heavy rock.                |
| Unilingual | El estudiante nunca saca la basura apestosa.            |
| LOLI       | El estudiante nunca saca la trash apestosa.             |
| MWCS       | El estudiante nunca saca la stinky trash.               |
| Unilingual | El bosque es iluminado por la luna redonda.             |
| LOLI       | El bosque es iluminado por la moon redonda.             |
| MWCS       | El bosque es iluminado por la round moon.               |
| Unilingual | El piloto evitó la nube oscura.                         |
| LOLI       | El piloto evitó la cloud oscura.                        |
| MWCS       | El piloto evitó la dark cloud.                          |
| Unilingual | La campista encendió el fuego con una rama seca.        |
| LOLI       | La campista encendió el fuego con una branch seca.      |
| MWCS       | La campista encendió el fuego con una dry branch.       |
| Unilingual | La chica quería devolver la camisa fea.                 |
| LOLI       | La chica quería devolver la shirt fea.                  |
| MWCS       | La chica quería devolver la ugly shirt.                 |
| Unilingual | El jugo se arruinó por las chinas agrias.               |
| LOLI       | El jugo se arruinó por las oranges agrias.              |
| MWCS       | El jugo se arruinó por las sour oranges.                |
| Unilingual | El tigre se escapó de la jaula abierta.                 |
| LOLI       | El tigre se escapó de la cage abierta.                  |
| MWCS       | El tigre se escapó de la open cage.                     |
| Unilingual | El campesino estaba buscando una vaca perdida.          |
| LOLI       | El campesino estaba buscando una cow perdida.           |
| MWCS       | El campesino estaba buscando una lost cow.              |
| Unilingual | La mujer no quería usar la correa larga.                |
| LOLI       | La mujer no quería usar la belt larga.                  |

|            |                                                     |
|------------|-----------------------------------------------------|
| MWCS       | La mujer no quería usar la long belt.               |
| Unilingual | El caballo está molesto con las moscas fastidiosas. |
| LOLI       | El caballo está molesto con las flies fastidiosas.  |
| MWCS       | El caballo está molesto con las annoying flies.     |
| Unilingual | El niño siempre lleva una gorra suelta.             |
| LOLI       | El niño siempre lleva una hat suelta.               |
| MWCS       | El niño siempre lleva una loose hat.                |
| Unilingual | Recolectaron leña para la fogata ardiente.          |
| LOLI       | Recolectaron leña para la campfire ardiente.        |
| MWCS       | Recolectaron leña para la burning campfire.         |
| Unilingual | Los niños se reían con la foca chistosa.            |
| LOLI       | Los niños se reían con la seal chistosa.            |
| MWCS       | Los niños se reían con la funny seal.               |
| Unilingual | La cocinera no quería usar el maíz enlatado.        |
| LOLI       | La cocinera no quería usar el corn enlatado.        |
| MWCS       | La cocinera no quería usar el canned corn.          |
| Unilingual | La bebida se diluyó por el hielo derretido.         |
| LOLI       | La bebida se diluyó por el ice derretido.           |
| MWCS       | La bebida se diluyó por el melted ice.              |
| Unilingual | El zorro se comió el ratón muerto.                  |
| LOLI       | El zorro se comió el mouse muerto.                  |
| MWCS       | El zorro se comió el dead mouse.                    |
| Unilingual | La tienda vende varios jabones olorosos.            |
| LOLI       | La tienda vende varios soaps olorosos.              |
| MWCS       | La tienda vende varios fragrant soaps.              |
| Unilingual | La familia decoró la casa con globos anaranjados.   |
| LOLI       | La familia decoró la casa con balloons anaranjados. |
| MWCS       | La familia decoró la casa con orange balloons.      |
| Unilingual | El matador se enfrentó al toro débil.               |
| LOLI       | El matador se enfrentó al bull débil.               |
| MWCS       | El matador se enfrentó al weak bull.                |
| Unilingual | La dentista le sacó el diente flojo.                |
| LOLI       | La dentista le sacó el tooth flojo.                 |
| MWCS       | La dentista le sacó el loose tooth.                 |
| Unilingual | La receta requiere una cucharada de ajo molido.     |
| LOLI       | La receta requiere una cucharada de garlic molido.  |
| MWCS       | La receta requiere una cucharada de ground garlic.  |
| Unilingual | La niña necesitaba un lápiz rosado.                 |
| LOLI       | La niña necesitaba un pencil rosado.                |
| MWCS       | La niña necesitaba un pink pencil.                  |
| Unilingual | El granjero le dio de comer al cerdo gordo.         |
| LOLI       | El granjero le dio de comer al pig gordo.           |
| MWCS       | El granjero le dio de comer al fat pig.             |

|            |                                                      |
|------------|------------------------------------------------------|
| Unilingual | El mesero sirvió un pescado horneado.                |
| LOLI       | El mesero sirvió un fish horneado.                   |
| MWCS       | El mesero sirvió un baked fish.                      |
| Unilingual | El cocinero sirve el arroz con cangrejo hervido.     |
| LOLI       | El cocinero sirve el arroz con crab hervido.         |
| MWCS       | El cocinero sirve el arroz con boiled crab.          |
| Unilingual | El papá se sentó en el sillón cómodo.                |
| LOLI       | El papá se sentó en el armchair cómodo.              |
| MWCS       | El papá se sentó en el comfortable armchair.         |
| Unilingual | El hombre fue pateado por el burro terco.            |
| LOLI       | El hombre fue pateado por el donkey terco.           |
| MWCS       | El hombre fue pateado por el stubborn donkey.        |
| Unilingual | El hombre dijo que necesita un teclado inalámbrico.  |
| LOLI       | El hombre dijo que necesita un keyboard inalámbrico. |
| MWCS       | El hombre dijo que necesita un wireless keyboard.    |

---

**Table S2.** Model summary with reference level of Unilingual, Masculine.

| <b>Parametric Coefficients</b>                     | <b>Estimate</b> | <b>SE</b>     | <b>t-value</b> | <b>p-value</b> |   |
|----------------------------------------------------|-----------------|---------------|----------------|----------------|---|
| (Intercept)                                        | -93.969         | 5.029         | -18.685        | < .001         | * |
| IsF (TRUE)                                         | -0.961          | 5.507         | -0.175         | .861           |   |
| IsLOLI (TRUE)                                      | 6.280           | 6.147         | 1.022          | .307           |   |
| IsMWA (TRUE)                                       | 13.399          | 6.145         | 2.181          | .029           | * |
| IsLOLIF (TRUE)                                     | 10.466          | 8.285         | 1.263          | .207           |   |
| IsMWAF (TRUE)                                      | -5.370          | 7.633         | -0.704         | .482           |   |
| <b>Smooth Terms</b>                                | <b>EDF</b>      | <b>Ref.df</b> | <b>F-value</b> | <b>p-value</b> |   |
| s(gaze_x, gaze_y)                                  | 28.479          | 28.918        | 2344.104       | < .001         | * |
| s(bin)                                             | 14.124          | 16.640        | 10.023         | < .001         | * |
| s(bin): IsF (TRUE)                                 | 1.081           | 1.125         | 0.422          | .503           |   |
| s(bin): IsLOLI (TRUE)                              | 8.310           | 10.746        | 2.136          | .015           | * |
| s(bin): IsMWA (TRUE)                               | 2.518           | 3.158         | 0.729          | .529           |   |
| s(bin): IsLOLIF (TRUE)                             | 6.550           | 8.626         | 1.028          | .323           |   |
| s(bin): IsMWAF (TRUE)                              | 1.136           | 1.206         | 0.038          | .956           |   |
| <b>Random Smooths</b>                              | <b>EDF</b>      | <b>Ref.df</b> | <b>F-value</b> | <b>p-value</b> |   |
| s(bin, participant)                                | 235.471         | 290.000       | 5.444          | < .001         | * |
| s(bin, participant): IsF (TRUE)                    | 151.473         | 290.000       | 1.401          | < .001         | * |
| s(bin, participant): IsLOLI (TRUE)                 | 157.972         | 289.000       | 1.673          | < .001         | * |
| s(bin, participant): IsMWA (TRUE)                  | 171.587         | 289.000       | 2.020          | < .001         | * |
| s(bin, participant): IsLOLIF (TRUE)                | 110.434         | 289.000       | 0.947          | < .001         | * |
| s(bin, participant): IsMWAF (TRUE)                 | 150.572         | 289.000       | 1.323          | < .001         | * |
| s(bin, group)                                      | 248.492         | 450.000       | 1.747          | < .001         | * |
| s(bin, group): IsLOLI (TRUE)                       | 227.441         | 448.000       | 1.629          | < .001         | * |
| s(bin, group): IsMWA (TRUE)                        | 237.277         | 448.000       | 1.640          | < .001         | * |
| R <sup>2</sup> = 0.148; Deviance Explained = 12.8% |                 |               |                |                |   |

Note: “\*” refers to  $p < 0.05$

**Table S3.** Model summary with reference level of Unilingual, Feminine.

| <b>Parametric Coefficients</b>                     | <b>Estimate</b> | <b>SE</b>     | <b>t-value</b> | <b>p-value</b> |   |
|----------------------------------------------------|-----------------|---------------|----------------|----------------|---|
| (Intercept)                                        | -94.093         | 5.482         | -17.164        | < .001         | * |
| IsM (TRUE)                                         | -0.553          | 5.244         | -0.105         | .916           |   |
| IsLOLI (TRUE)                                      | 14.933          | 6.314         | 2.365          | .018           | * |
| IsMWA (TRUE)                                       | 6.123           | 5.837         | 1.049          | .294           |   |
| IsLOLIM (TRUE)                                     | -9.135          | 7.996         | -1.142         | .253           |   |
| IsMWAM (TRUE)                                      | 7.552           | 7.950         | 0.950          | .342           |   |
| <b>Smooth Terms</b>                                | <b>EDF</b>      | <b>Ref.df</b> | <b>F-value</b> | <b>p-value</b> |   |
| s(gaze_x, gaze_y)                                  | 28.455          | 28.911        | 2336.259       | < .001         | * |
| s(bin)                                             | 14.185          | 16.700        | 9.753          | < .001         | * |
| s(bin): IsM (TRUE)                                 | 1.812           | 2.195         | 0.871          | .458           |   |
| s(bin): IsLOLI (TRUE)                              | 7.772           | 10.105        | 2.262          | .012           | * |
| s(bin): IsMWA (TRUE)                               | 1.017           | 1.026         | 0.708          | .410           |   |
| s(bin): IsLOLIM (TRUE)                             | 6.623           | 8.712         | 1.270          | .233           |   |
| s(bin): IsMWAM (TRUE)                              | 2.061           | 2.534         | 0.577          | .594           |   |
| <b>Random Smooths</b>                              | <b>EDF</b>      | <b>Ref.df</b> | <b>F-value</b> | <b>p-value</b> |   |
| s(bin, participant)                                | 241.556         | 289.000       | 7.280          | < .001         | * |
| s(bin, participant): IsM (TRUE)                    | 131.793         | 290.000       | 1.029          | < .001         | * |
| s(bin, participant): IsLOLI (TRUE)                 | 146.961         | 290.000       | 1.592          | < .001         | * |
| s(bin, participant): IsMWA (TRUE)                  | 132.663         | 290.000       | 1.206          | < .001         | * |
| s(bin, participant): IsLOLIM (TRUE)                | 109.956         | 290.000       | 0.840          | < .001         | * |
| s(bin, participant): IsMWAM (TRUE)                 | 173.968         | 290.000       | 1.769          | < .001         | * |
| s(bin, group)                                      | 251.078         | 449.000       | 1.797          | < .001         | * |
| s(bin, group): IsLOLI (TRUE)                       | 230.230         | 450.000       | 1.653          | < .001         | * |
| s(bin, group): IsMWA (TRUE)                        | 237.544         | 450.000       | 1.646          | < .001         | * |
| R <sup>2</sup> = 0.146; Deviance Explained = 12.7% |                 |               |                |                |   |

Note: "\*\*\*" refers to  $p < 0.05$

**Table S4.** Model summary with reference level of LOLI, Masculine.

| <b>Parametric Coefficients</b>                     | <b>Estimate</b> | <b>SE</b>     | <b>t-value</b> | <b>p-value</b> |   |
|----------------------------------------------------|-----------------|---------------|----------------|----------------|---|
| (Intercept)                                        | -91.170         | 5.174         | -17.620        | < .001         | * |
| IsF (TRUE)                                         | 8.088           | 5.223         | 1.548          | .122           |   |
| IsUni (TRUE)                                       | -8.611          | 6.220         | -1.384         | .166           |   |
| IsMWA (TRUE)                                       | 6.417           | 5.467         | 1.174          | .241           |   |
| IsUniF (TRUE)                                      | -7.829          | 8.159         | -0.960         | .337           |   |
| IsMWAF (TRUE)                                      | -14.619         | 7.407         | -1.974         | .048           | * |
| <b>Smooth Terms</b>                                | <b>EDF</b>      | <b>Ref.df</b> | <b>F-value</b> | <b>p-value</b> |   |
| s(gaze_x, gaze_y)                                  | 28.537          | 28.933        | 2352.981       | < .001         | * |
| s(bin)                                             | 13.939          | 16.500        | 8.036          | < .001         | * |
| s(bin): IsF (TRUE)                                 | 5.120           | 6.749         | 0.869          | .556           |   |
| s(bin): IsUni (TRUE)                               | 4.813           | 6.365         | 1.729          | .100           |   |
| s(bin): IsMWA (TRUE)                               | 1.043           | 1.066         | 0.055          | .869           |   |
| s(bin): IsUniF (TRUE)                              | 1.024           | 1.038         | 0.046          | .864           |   |
| s(bin): IsMWAF (TRUE)                              | 2.301           | 2.875         | 0.450          | .701           |   |
| <b>Random Smooths</b>                              | <b>EDF</b>      | <b>Ref.df</b> | <b>F-value</b> | <b>p-value</b> |   |
| s(bin, participant)                                | 238.048         | 290.000       | 6.192          | < .001         | * |
| s(bin, participant): IsF (TRUE)                    | 114.917         | 290.000       | 0.936          | < .001         | * |
| s(bin, participant): IsUni (TRUE)                  | 149.803         | 290.000       | 1.492          | < .001         | * |
| s(bin, participant): IsMWA (TRUE)                  | 170.961         | 290.000       | 1.942          | < .001         | * |
| s(bin, participant): IsUniF (TRUE)                 | 144.597         | 289.000       | 1.282          | < .001         | * |
| s(bin, participant): IsMWAF (TRUE)                 | 141.014         | 289.000       | 1.193          | < .001         | * |
| s(bin, group)                                      | 219.913         | 449.000       | 1.368          | < .001         | * |
| s(bin, group): IsUni (TRUE)                        | 250.516         | 449.000       | 1.911          | < .001         | * |
| s(bin, group): IsMWA (TRUE)                        | 221.352         | 449.000       | 1.339          | < .001         | * |
| R <sup>2</sup> = 0.151; Deviance Explained = 12.8% |                 |               |                |                |   |

Note: "\*\*\*" refers to  $p < 0.05$

**Table S5.** Model summary with reference level of MWA, Feminine.

| <b>Parametric Coefficients</b>                     | <b>Estimate</b> | <b>SE</b>     | <b>t-value</b> | <b>p-value</b> |   |
|----------------------------------------------------|-----------------|---------------|----------------|----------------|---|
| (Intercept)                                        | -84.567         | 5.458         | -15.493        | < .001         | * |
| IsM (TRUE)                                         | 7.030           | 4.735         | 1.485          | .138           |   |
| IsUni (TRUE)                                       | -7.575          | 6.347         | -1.193         | .233           |   |
| IsLOLI (TRUE)                                      | 9.557           | 5.888         | 1.623          | .105           |   |
| IsUniM (TRUE)                                      | -8.035          | 7.853         | -1.023         | .306           |   |
| IsLOLIM (TRUE)                                     | -16.105         | 7.597         | -2.120         | .034           | * |
| <b>Smooth Terms</b>                                | <b>EDF</b>      | <b>Ref.df</b> | <b>F-value</b> | <b>p-value</b> |   |
| s(gaze_x, gaze_y)                                  | 28.469          | 28.915        | 2348.516       | < .001         | * |
| s(bin)                                             | 14.158          | 16.701        | 9.861          | < .001         | * |
| s(bin): IsM (TRUE)                                 | 1.020           | 1.032         | 0.186          | .679           |   |
| s(bin): IsUni (TRUE)                               | 1.076           | 1.114         | 0.234          | .711           |   |
| s(bin): IsLOLI (TRUE)                              | 7.327           | 9.566         | 1.491          | .132           |   |
| s(bin): IsUniM (TRUE)                              | 2.029           | 2.489         | 0.765          | .511           |   |
| s(bin): IsLOLIM (TRUE)                             | 6.340           | 8.356         | 1.207          | .274           |   |
| <b>Random Smooths</b>                              | <b>EDF</b>      | <b>Ref.df</b> | <b>F-value</b> | <b>p-value</b> |   |
| s(bin, participant)                                | 241.502         | 289.000       | 7.150          | < .001         | * |
| s(bin, participant): IsM (TRUE)                    | 143.502         | 289.000       | 1.137          | < .001         | * |
| s(bin, participant): IsUni (TRUE)                  | 161.675         | 289.000       | 1.763          | < .001         | * |
| s(bin, participant): IsLOLI (TRUE)                 | 145.877         | 289.000       | 1.615          | < .001         | * |
| s(bin, participant): IsUniM (TRUE)                 | 138.926         | 285.000       | 1.211          | < .001         | * |
| s(bin, participant): IsLOLIM (TRUE)                | 131.182         | 290.000       | 1.183          | < .001         | * |
| s(bin, group)                                      | 221.492         | 448.000       | 1.304          | < .001         | * |
| s(bin, group): IsUni (TRUE)                        | 254.151         | 449.000       | 1.939          | < .001         | * |
| s(bin, group): IsLOLI (TRUE)                       | 221.891         | 449.000       | 1.423          | < .001         | * |
| R <sup>2</sup> = 0.149; Deviance Explained = 12.8% |                 |               |                |                |   |

Note: “\*” refers to  $p < 0.05$
